# Supplementary material for: Selection of suitable housekeeping genes for expression analysis in glioblastoma using quantitative RT-PCR
Source: PubMed Central journal article supplement (PMC2661085; doi:10.1186/1471-2199-10-17), 2009-03-03

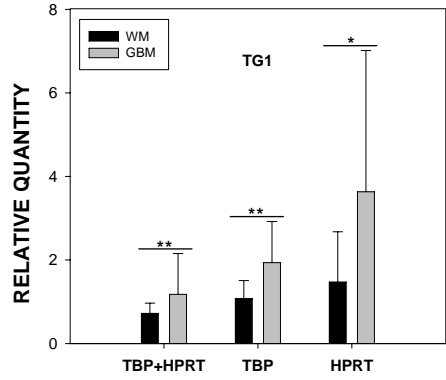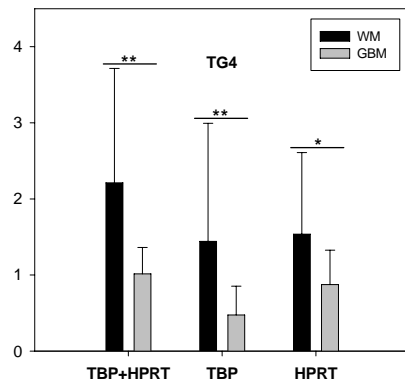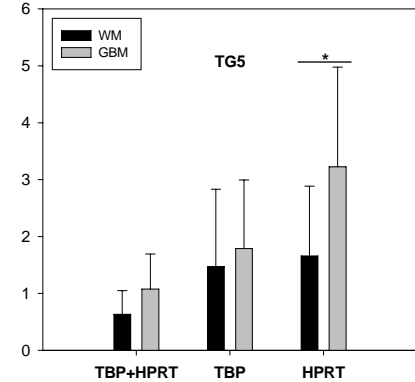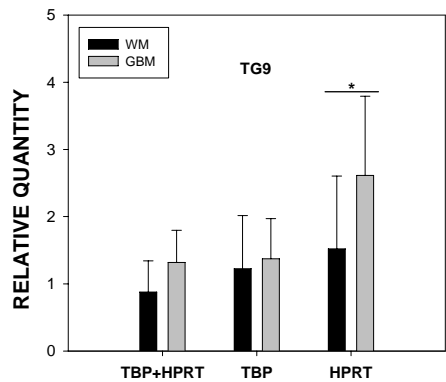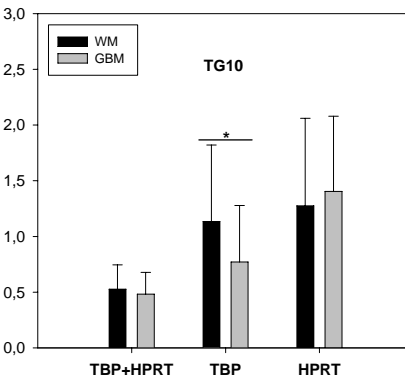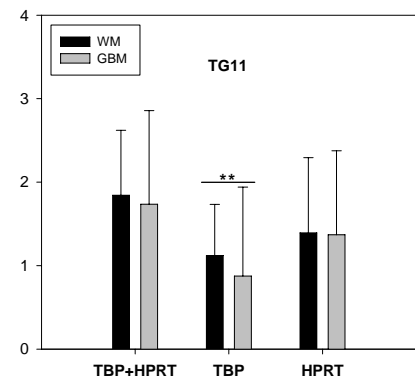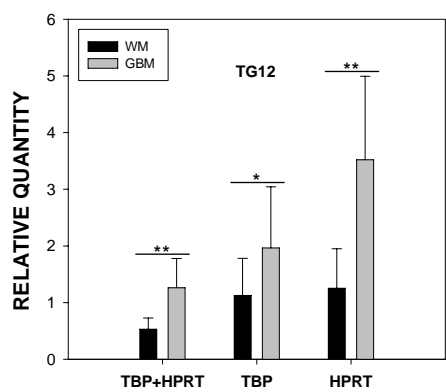

Supplement: 1471-2199-10-17-S1.pdf [file 1471-2199-10-17-S1.pdf]
